# Supplementary material for: Malic Enzyme Couples Mitochondria with Aerobic Glycolysis in Osteoblasts
Source: PubMed Central journal article supplement (PMC8183612; doi:10.1016/j.celrep.2020.108108), 2020-09-08
Supplement: NIHMS1627869-supplement-1.pdf [file NIHMS1627869-supplement-1.pdf]

**Cell Reports, Volume 32**

**Supplemental Information**

**Malic Enzyme Couples Mitochondria  
with Aerobic Glycolysis in Osteoblasts**

**Wen-Chih Lee, Xing Ji, Itzhak Nissim, and Fanxin Long**



Supplemental Fig. S2

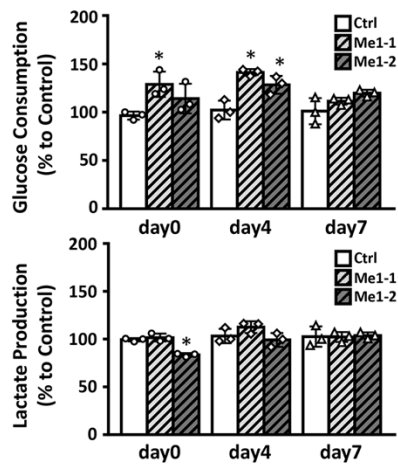

**Figure S2. Effects of Me1 knockdown on glucose consumption or lactate production.** Related to Figure 7.

Ctrl: shRNA against EGFP; Me1-1: shRNA #1 against Me1; Me1-2: shRNA #2 against Me1. \*:  $p < 0.05$ ,  $n = 3$ . Error bars: std.

**Table S1. Equations for calculations of ATP production from Seahorse data. Related to STAR Methods section.**

| Calculated Values                | Equations                                                                                                |
|----------------------------------|----------------------------------------------------------------------------------------------------------|
| $OCR_{mito}$                     | $= (OCR_{total} - OCR_{rot/myc})$                                                                        |
| $OCR_{coupled}$                  | $= (OCR_{total} - OCR_{oligo}) * \text{hyperpolarization correction factor}$                             |
| $PPR_{total}$                    | $= (ECR_{total} / \text{buffering power})$                                                               |
| $PPR_{resp}$                     | $= (OCR_{mito} * (\max H^+ / O_2) * ((10^{pH-pK_1}) / (1 + 10^{pH-pK_1}))) = (OCR_{mito} * K_{PPRresp})$ |
| $PPR_{glyc}$                     | $= (PPR_{total} - PPR_{resp})$                                                                           |
| Glycolytic ATP ( $J_{ATPglyc}$ ) | $= (PPR_{glyc} * \text{ATP/lactate}) + (OCR_{mito} * 2 * \text{ATP}/[O]_{glyc})$                         |
| Oxidative ATP ( $J_{ATPox}$ )    | $= (OCR_{coupled} * 2 * \text{ATP}/[O]_{oxphos}) + (OCR_{mito} * 2 * \text{ATP}/[O]_{TCA})$              |

| Parameters                                    | Values | Parameters         | Values |
|-----------------------------------------------|--------|--------------------|--------|
| buffering power (mpH/pmol $H^+$ )             | 0.045  | $K_{PPRresp}$      | 0.953  |
| $pK_1$ at 37°C ( $CO_2 \rightarrow HCO_3^-$ ) | 6.093  | $ATP/[O]_{glyc}$   | 0.167  |
| hyperpolarization correction factor           | 0.908  | $ATP/[O]_{oxphos}$ | 2.486  |
| $\max H^+ / O_2$                              | 1.000  | $ATP/[O]_{TCA}$    | 0.121  |
| ATP/lactate                                   | 1.000  |                    |        |

**Table S2. Primers for RT-qPCR.** Related to STAR Methods section.

| <b>Primer</b> | <b>Sequence</b>        |
|---------------|------------------------|
| Alpl_Mm_F     | ACTGATGTGGAATACGAACTGG |
| Alpl_Mm_R     | AGTTCAGTGCGGTTCCAG     |
| Atf4_Mm_F     | ATGGCGTATTAGAGGCAGC    |
| Atf4_Mm_R     | CTTTGTCCGTTACAGCAACAC  |
| Bglap2_Mm_F*  | CACCTAGCAGACACCATGAG   |
| Bglap2_Mm_R*  | GTTCACTACCTTATTGCCCTCC |
| Col1a1_Mm_F   | AGCCGCAAAGAGTCTACATG   |
| Col1a1_Mm_R   | CTTAGGCCATTGTGTATGCAG  |
| Ldha_Mm_F     | GCTCCCCAGAACAAGATTACAG |
| Ldha_Mm_R     | TCGCCCTTGAGTTTGTCTTC   |
| Me1_Mm_F      | AGTATCCATGACAAAGGGCAC  |
| Me1_Mm_R      | ATCCCATTACAGCCAAGGTC   |
| Me2_Mm_F      | TGTTATTCTCTGTGAAGCCCG  |
| Me2_Mm_R      | TGAATATTAGCCAGCGACGG   |
| Rn18s_Mm_F    | CGGCTACCACATCCAAGGAA   |
| Rn18s_Mm_R    | GCTGGAATTACCGCGGCT     |
| Sp7_Mm_F      | ATCTTCCACTTCGCCTGC     |
| Sp7_Mm_R      | AACCAATGGGTCCACCGC     |

\* By Primer-BLAST from NCBI, this primer set also recognize Bglap and Bglap3.

**Table S3. Primers for DNA-qPCR.** Related to STAR Methods section.

| <b>Primer</b>    | <b>Sequence</b>          |
|------------------|--------------------------|
| Hk2_Mm_gDNA_F    | GCCAGCCTCTCCTGATTTTAGTGT |
| Hk2_Mm_gDNA_R    | GGGAACACAAAAGACCTCTTCTGG |
| mtNd4_Mm_gDNA_1F | CATCACTCCTATTCTGCCTAGC   |
| mtNd4_Mm_gDNA_1R | GTGGCTATAAGTGGGAAGACC    |
| mtNd4_Mm_gDNA_2F | AGCTCAATCTGCTTACGCCA     |
| mtNd4_Mm_gDNA_2R | TGTGAGGCCATGTGCGATTA     |
